# Supplementary material for: AhR transcriptional activity in serum of Inuits across Greenlandic districts
Source: PubMed Central journal article supplement (PMC2173889; doi:10.1186/1476-069x-6-32), 2007-10-23
Supplement: 1476-069X-6-32-S1.pdf [file 1476-069X-6-32-S1.pdf]

Supplementary Table. Multiple regressions of the combined study groups

| <b>Across districts (men + women)</b> |                                   |                                         |                               |                |
|---------------------------------------|-----------------------------------|-----------------------------------------|-------------------------------|----------------|
| Response variable                     | Homogeneity of slope<br>(p value) | Common slope, Estimate (SE),<br>p value | Common intercept<br>(p value) | R <sup>2</sup> |
| <b>AhR-TEQ (n=254)</b>                |                                   |                                         |                               |                |
| ∑ PCB 14                              | 0.80                              | <b>-0.09 (0.04), 0.03</b>               | <b>&lt;0.001</b>              | 0.22           |
| ∑ pesticide                           | 0.73                              | <b>-0.09 (0.04), 0.02</b>               | <b>&lt;0.001</b>              | 0.23           |
| ∑ POP                                 | 0.74                              | <b>-0.1 (0.04), 0.02</b>                | <b>&lt;0.001</b>              | 0.22           |
| <b>AhRcomp (n=327)</b>                |                                   |                                         |                               |                |
| ∑ PCB 14                              | <b>0.01</b>                       | -*                                      | -*                            | -*             |
| ∑ pesticide                           | <b>0.02</b>                       | -*                                      | -*                            | -*             |
| ∑ POP                                 | <b>0.02</b>                       | -*                                      | -*                            | -*             |
| <b>Across districts (men only)</b>    |                                   |                                         |                               |                |
| <b>AhR-TEQ (n=135 )</b>               |                                   |                                         |                               |                |
| ∑ PCB 14                              | 0.71                              | -0.12 (0.07), 0.10                      | <b>&lt;0.001</b>              | 0.21           |
| ∑ pesticide                           | 0.45                              | -0.11 (0.06), 0.07                      | <b>&lt;0.001</b>              | 0.22           |
| ∑ POP                                 | 0.56                              | -0.12 (0.07), 0.07                      | <b>&lt;0.001</b>              | 0.21           |
| <b>AhRcomp (n=164 )</b>               |                                   |                                         |                               |                |
| ∑ PCB 14                              | 0.77                              | -0.06 (0.04), 0.13                      | <b>&lt;0.001</b>              | 0.30           |
| ∑ pesticide                           | 0.45                              | <b>-0.007 (0.03), 0.03</b>              | <b>&lt;0.001</b>              | 0.29           |
| ∑ POP                                 | 0.77                              | -0.006 (0.04), 0.08                     | <b>&lt;0.001</b>              | 0.30           |
| <b>Across districts (women only)</b>  |                                   |                                         |                               |                |
| <b>AhR-TEQ (n=119 )</b>               |                                   |                                         |                               |                |
| ∑ PCB 14                              | 0.22                              | -0.03 (0.06), 0.61                      | <b>&lt;0.001</b>              | 0.19           |
| ∑ pesticide                           | 0.11                              | -0.04 (0.06), 0.54                      | <b>&lt;0.001</b>              | 0.20           |
| ∑ POP                                 | 0.14                              | -0.04 (0.06), 0.54                      | <b>&lt;0.001</b>              | -0.19**        |
| <b>AhRcomp (n=163 )</b>               |                                   |                                         |                               |                |
| ∑ PCB 14                              | 0.25                              | -0.04 (0.05), 0.34                      | 0.93                          | -0.01**        |
| ∑ pesticide                           | 0.23                              | -0.05 (0.04), 0.26                      | 0.94                          | -0.01**        |
| ∑ POP                                 | 0.24                              | -0.05 (0.05), 0.30                      | 0.93                          | -0.01**        |
| <b>Across sexes (all districts)</b>   |                                   |                                         |                               |                |
| <b>AhR-TEQ (n=254)</b>                |                                   |                                         |                               |                |
| ∑ PCB 14                              | 0.13                              | <b>-0.08 (0.04), 0.05</b>               | 0.33                          | 0.02           |
| ∑ pesticide                           | 0.11                              | <b>-0.10 (0.04), 0.01</b>               | 0.47                          | 0.03           |
| ∑ POP                                 | 0.13                              | <b>-0.1 (0.04), 0.02</b>                | 0.35                          | 0.03           |
| <b>AhRcomp (n=327)</b>                |                                   |                                         |                               |                |
| ∑ PCB 14                              | 0.27                              | <b>-0.07 (0.02), 0.006</b>              | <b>0.001</b>                  | 0.08           |
| ∑ pesticide                           | 0.31                              | <b>-0.07 (0.02), 0.003</b>              | <b>0.001</b>                  | 0.08           |
| ∑ POP                                 | 0.28                              | <b>-0.07 (0.02), 0.004</b>              | <b>0.001</b>                  | 0.08           |

Both AhR activities and POPs are ln transformed. Homogeneity of slope: test for homogeneity of association between exposure variables and outcome variables across the study group (p > 0.05, accept the hypotheses of homogeneity of slope). Common slope: the estimated common slope across study groups assuming homogeneity (p > 0.05, accept the hypotheses that slope equals to zero). Common intercept: test of a common intercept across study groups assuming a common slope (p > 0.05, accept the hypotheses having common intercept across the study groups). R<sup>2</sup> (Adjusted R square) assumes a common slope. Bold values are those showing significance.

\*: Since heterogeneity of slope exists between POPs and AhRcomp across the districts, i.e. there were district differences in the associations of POP and AhRcomp, no further evaluation was performed.

\*\* : equals to zero
